# Supplementary material
Source: publisher site journal article supplement (https://www.dovepress.com/article/359775)
Supplement: Supplementary file 1 [file get_supplementary_file.php]

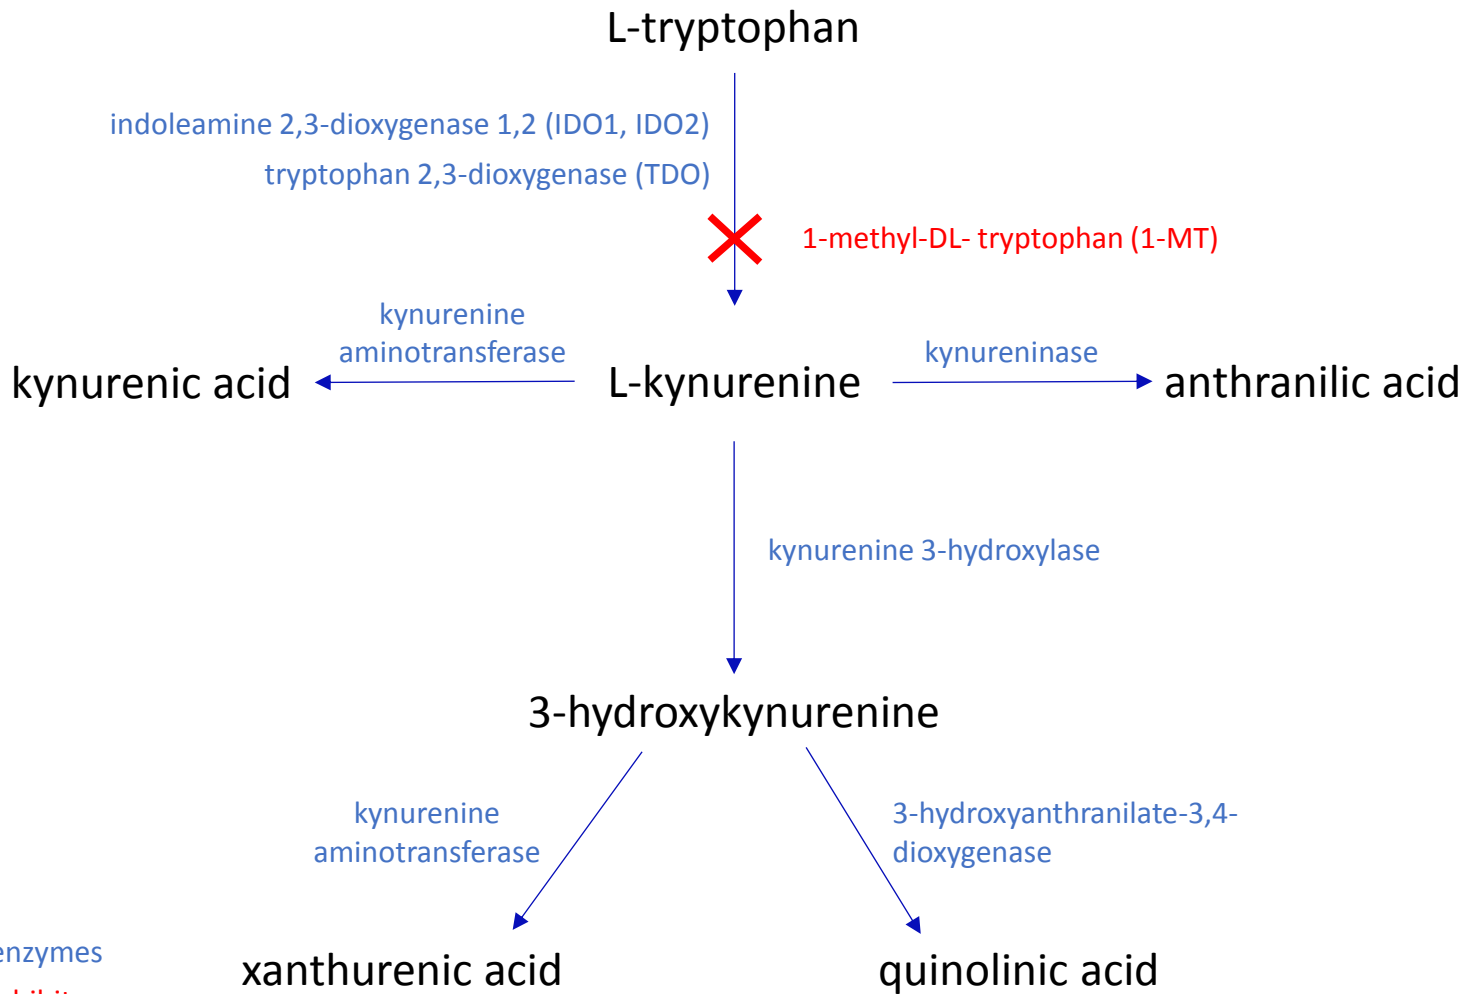

enzymes  
inhibitors  
metabolites

Supplementary Figure 1  
The tryptophan degradation pathway. It is created by enzymes (blue), metabolites (black) and inhibitor (red).
